# Supplementary material for: Sequential implementation of DSC-MR perfusion and dynamic [18F]FET PET allows efficient differentiation of glioma progression from treatment-related changes
Source: Eur J Nucl Med Mol Imaging. 2020 Nov 26;48(6):1956–65. doi: 10.1007/s00259-020-05114-0 (PMC8113145; doi:10.1007/s00259-020-05114-0)
Supplement: Supplementary file 9 — (XLSX 19 kb) [file 259_2020_5114_MOESM5_ESM.xlsx]

## Sheet: Data
Patient	Age	Glioma subtyp (WHO 2016 classification)	WHO grade	MGMT promoter	Isocitrat-dehydrogenase (IDH)	Final diagnosis	Method of diagnosis	TBRmax (maximum tumor-brain-ratio)	TBRmean (mean tumor-brain-ratio)	TTP (time-to-peak in minutes)	Slope (slope of the time activity curve 20-40 minutes post injection expressed in change of standardized uptake value per hou, SUV/h)	rCBVmax (maximum relative cerebral blood volume)
1	34.5479	Astrocytoma, IDH-mutant	III	not available	mutated	Treatment-related changes	Histopathology (resection)	1.6	1.6	32.5	0.75	0.909091
2	37.8219	Glioblastoma, IDH-wildtype	IV	methylated	wildtype	Tumor progression	Clinicoradiological follow-up	2.9	2.2	32.5	0.66	6.43529
3	32.4356	Glioblastoma, IDH-mutant	IV	unmethylated	mutated	Tumor progression	Histopathology (resection)	1.4	1.4	37.5	0.75	2.64
4	45.9836	Glioblastoma, IDH-wildtype	IV	methylated	wildtype	Tumor progression	Histopathology (resection)	3.3	2.5	37.5	0.45	7.76712
5	57.2658	Glioblastoma, IDH-wildtype	IV	methylated	wildtype	Tumor progression	Histopathology (resection)	1.6	1.6	37.5	0.15	1.80208
6	69.7315	Glioblastoma, IDH-wildtype	IV	methylated	wildtype	Tumor progression	Clinicoradiological follow-up	3	2.3	18.5	-0.86	9.09524
7	29.6466	Astrocytoma, IDH-mutant	III	not available	mutated	Treatment-related changes	Clinicoradiological follow-up	1.3	1.3	22.5	-0.07	0.448276
8	24.1342	Diffuse midline glioma, H3 K27M-mutant	IV	unmethylated	wildtype	Tumor progression	Clinicoradiological follow-up	2.1	2.1	32.5	0.56	1.32934
9	52.8411	Glioblastoma, IDH-wildtype	IV	unmethylated	wildtype	Tumor progression	Histopathology (resection)	2.3	2	37.5	0.82	3.23214
10	69.2603	Glioblastoma, IDH-wildtype	IV	methylated	wildtype	Tumor progression	Clinicoradiological follow-up	2.8	2.3	18.5	-0.04	5.6878
11	73.6219	Glioblastoma, IDH-wildtype	IV	methylated	wildtype	Tumor progression	Clinicoradiological follow-up	2.1	2	32.5	0.09	2.2
12	69.7123	Glioblastoma, IDH-wildtype	IV	methylated	wildtype	Tumor progression	Clinicoradiological follow-up	2.2	1.9	32.5	0.06	4.19444
13	50.9178	Oligodendroglioma, IDH-mutant and 1p/19q-codeleted	II	not available	mutated	Treatment-related changes	Clinicoradiological follow-up	1.9	1.9	37.5	0.99	2.144
14	38.2877	Glioblastoma, IDH-wildtype	IV	methylated	wildtype	Tumor progression	Clinicoradiological follow-up	1.6	1.6	32.5	0.3	3.56303
15	31.9726	Oligodendroglioma, IDH-mutant and 1p/19q-codeleted	III	methylated	mutated	Tumor progression	Histopathology (biopsy)	1.9	1.9	32.5	0.13	2.75
16	56.0959	Glioblastoma, IDH-wildtype	IV	unmethylated	wildtype	Tumor progression	Clinicoradiological follow-up	1.9	1.9	10	0.34	1.31667
17	77.9699	Other	II	methylated	wildtype	Tumor progression	Clinicoradiological follow-up	1.8	1.8	32.5	-0.22	1.55385
18	46.737	Glioblastoma, IDH-mutant	IV	methylated	mutated	Tumor progression	Histopathology (biopsy)	2.4	1.9	37.5	1.2	2.09091
19	49.4603	Glioblastoma, IDH-wildtype	IV	methylated	wildtype	Tumor progression	Clinicoradiological follow-up	2.2	2.1	27.5	-0.26	3.91129
20	51.8	Glioblastoma, IDH-wildtype	IV	methylated	wildtype	Tumor progression	Histopathology (resection)	3.6	2.4	6.5	-2.66	9.72727
21	44.737	Glioblastoma, IDH-wildtype	IV	unmethylated	wildtype	Tumor progression	Histopathology (resection)	2.6	2.3	32.5	-0.28	2.90291
22	65.3918	Glioblastoma, NOS	IV	methylated	not available	Tumor progression	Clinicoradiological follow-up	2.7	2.2	27.5	-0.29	4.3622
23	42.5452	Glioblastoma, IDH-wildtype	IV	unmethylated	wildtype	Treatment-related changes	Clinicoradiological follow-up	1.9	1.8	32.5	0.29	1.28
24	51.5507	Glioblastoma, IDH-wildtype	IV	methylated	wildtype	Tumor progression	Clinicoradiological follow-up	3.1	2.4	18.5	-0.52	4.73864
25	47.674	Glioblastoma, IDH-wildtype	IV	unmethylated	wildtype	Treatment-related changes	Clinicoradiological follow-up	1.9	1.9	37.5	1.2	2.02804
26	32.4137	Astrocytoma, NOS	III	not available	not available	Tumor progression	Clinicoradiological follow-up	1.3	1.3	37.5	0.5	1.19118
27	44.1068	Oligodendroglioma, IDH-mutant and 1p/19q-codeleted	II	not available	mutated	Tumor progression	Clinicoradiological follow-up	3.3	2.8	37.5	0.93	3.01961
28	63.0438	Glioblastoma, IDH-wildtype	IV	methylated	wildtype	Tumor progression	Histopathology (resection)	2.4	2.4	37.5	0.23	1.64249
29	51.1041	Astrocytoma, IDH-mutant	III	not available	mutated	Tumor progression	Clinicoradiological follow-up	2.2	2.1	15.5	-0.89	1.61446
30	47.8493	Glioblastoma, IDH-wildtype	IV	methylated	wildtype	Tumor progression	Clinicoradiological follow-up	1.3	1.3	32.5	0.56	1.08571
31	67.8137	Glioblastoma, IDH-wildtype	IV	methylated	wildtype	Tumor progression	Histopathology (resection)	2.7	2	32.5	0.49	1.21488
32	39.4712	Glioblastoma, IDH-wildtype	IV	unmethylated	wildtype	Tumor progression	Clinicoradiological follow-up	1.4	1.4	1.5	0.5	3.2807
33	77.1836	Glioblastoma, IDH-wildtype	IV	methylated	wildtype	Tumor progression	Clinicoradiological follow-up	3.1	2.5	32.5	0.63	4.84416
34	45.5233	Glioblastoma, IDH-wildtype	IV	unmethylated	wildtype	Tumor progression	Clinicoradiological follow-up	2.2	2	37.5	2.19	1.85211
35	57.9479	Glioblastoma, IDH-wildtype	IV	unmethylated	wildtype	Tumor progression	Clinicoradiological follow-up	1.9	1.8	27.5	0.31	1.02083
36	58.5452	Glioblastoma, IDH-wildtype	IV	unmethylated	wildtype	Tumor progression	Clinicoradiological follow-up	2.3	2	12.5	-0.44	4.45652
37	54.4822	Glioblastoma, IDH-wildtype	IV	methylated	wildtype	Tumor progression	Histopathology (resection)	2.2	2.1	37.5	0.6	1.87234
38	44.3123	Glioblastoma, IDH-wildtype	IV	methylated	wildtype	Tumor progression	Histopathology (resection)	2.7	2.3	27.5	-0.16	6.86486
39	54.4986	Glioblastoma, IDH-wildtype	IV	unmethylated	wildtype	Tumor progression	Clinicoradiological follow-up	1.6	1.6	15.5	-0.94	2.87342
40	53.5507	Astrocytoma, IDH-wildtype	III	unmethylated	wildtype	Treatment-related changes	Clinicoradiological follow-up	2.1	2	37.5	1.15	2.19318
41	29.9863	Astrocytoma, IDH-mutant	III	methylated	mutated	Treatment-related changes	Clinicoradiological follow-up	2.5	2.1	27.5	0.78	2.54839
42	48.5699	Astrocytoma, IDH-mutant	II	methylated	mutated	Tumor progression	clinicoradiological follow-up	3	2.4	27.5	-0.07	3.02817
43	69.2466	Oligodendroglioma, IDH-mutant and 1p/19q-codeleted	III	not available	mutated	Treatment-related changes	Histopathology (resection)	1.4	1.4	37.5	0.88	2.19841
44	48.9562	Astrocytoma, IDH-mutant	III	methylated	mutated	Tumor progression	Histopathology (resection)	2.4	1.9	32.5	1.2	3.26042
45	49.5096	Glioblastoma, IDH-wildtype	IV	unmethylated	wildtype	Tumor progression	Clinicoradiological follow-up	2	2	32.5	-0.02	5
46	43.3452	Astrocytoma, IDH-mutant	II	not available	mutated	Tumor progression	Clinicoradiological follow-up	3.1	2.2	37.5	0.04	3.14159
47	64.0822	Glioblastoma, IDH-wildtype	IV	methylated	wildtype	Tumor progression	Clinicoradiological follow-up	2.1	1.8	12.5	-0.41	3.03704
48	55.3616	Glioblastoma, IDH-wildtype	IV	not available	wildtype	Tumor progression	Histopathology (resection)	2.1	1.8	37.5	0.42	3.66957
49	37.5973	Astrocytoma, IDH-mutant	III	methylated	mutated	Tumor progression	Histopathology (resection)	1.3	1.3	27.5	0.15	1.87952
50	39.8	Astrocytoma, IDH-mutant	III	methylated	mutated	Tumor progression	Clinicoradiological follow-up	1.5	1.5	37.5	0.47	2.45113
51	57.7315	Astrocytoma, IDH-mutant	III	unmethylated	mutated	Tumor progression	Clinicoradiological follow-up	2.2	1.9	37.5	0.58	2.27273
52	45.2575	Glioblastoma, IDH-mutant	IV	methylated	mutated	Tumor progression	Histopathology (biopsy)	0.5	0.5	37.5	0.55	1.19355
53	65.7233	Astrocytoma, IDH-wildtype	III	methylated	wildtype	Treatment-related changes	Clinicoradiological follow-up	1.5	1.5	27.5	0.7	2.48387
54	52.1205	Glioblastoma, IDH-wildtype	IV	not available	wildtype	Treatment-related changes	Clinicoradiological follow-up	1.4	1.4	32.5	1.66	2.65753
55	52.7342	Astrocytoma, IDH-wildtype	II	not available	wildtype	Treatment-related changes	Clinicoradiological follow-up	1.4	1.3	37.5	1.6	2.47414
56	45.3041	Astrocytoma, IDH-mutant	III	methylated	mutated	Treatment-related changes	Histopathology (resection)	2.3	2.1	22.5	-0.6	2.01887
57	45.0548	Glioblastoma, IDH-wildtype	IV	unmethylated	wildtype	Tumor progression	Histopathology (resection)	2.2	2.1	37.5	0.54	1.91558
58	42.526	Glioblastoma, IDH-wildtype	IV	unmethylated	wildtype	Tumor progression	Clinicoradiological follow-up	2.9	2.1	22.5	-0.52	3.72527
59	52.5671	Astrocytoma, IDH-wildtype	III	unmethylated	wildtype	Tumor progression	Clinicoradiological follow-up	2.1	2	37.5	0.25	2.05556
60	55.5616	Glioblastoma, IDH-wildtype	IV	not available	wildtype	Tumor progression	Clinicoradiological follow-up	2.4	2	6.5	-0.83	2.28431
61	49.8	Glioblastoma, IDH-wildtype	IV	unmethylated	wildtype	Tumor progression	Histopathology (resection)	2	1.8	37.5	0.68	1.65625
62	74.8521	Glioblastoma, IDH-wildtype	IV	unmethylated	wildtype	Tumor progression	Histopathology (resection)	3.1	2.4	18.5	-0.28	2.55372
63	57.8767	Glioblastoma, IDH-wildtype	IV	unmethylated	wildtype	Tumor progression	Histopathology (resection)	2.7	2.3	32.5	0.16	1.9883
64	66.8959	Glioblastoma, IDH-wildtype	IV	unmethylated	wildtype	Tumor progression	Clinicoradiological follow-up	2.6	2.4	22.5	-0.77	4.09836
65	55.2027	Oligodendroglioma, IDH-mutant and 1p/19q-codeleted	III	methylated	mutated	Treatment-related changes	Clinicoradiological follow-up	2.3	2	37.5	0.44	2.5
66	52.7014	Glioblastoma, IDH-mutant	IV	methylated	mutated	Tumor progression	Clinicoradiological follow-up	1.9	1.9	32.5	0.3	3.11702
67	52.4356	Glioblastoma, IDH-wildtype	IV	not available	wildtype	Tumor progression	Clinicoradiological follow-up	2	1.8	22.5	-0.78	2.35106
68	20.4	Glioblastoma, IDH-wildtype	IV	methylated	wildtype	Tumor progression	Clinicoradiological follow-up	1.4	1.4	37.5	0.79	2.87671
69	36.7973	Glioblastoma, IDH-mutant	IV	methylated	mutated	Tumor progression	Clinicoradiological follow-up	1.5	1.5	37.5	0.32	2.12
70	55.6356	Glioblastoma, IDH-wildtype	IV	unmethylated	wildtype	Tumor progression	Clinicoradiological follow-up	1.8	1.8	18.5	-0.17	2.26087
71	63.0685	Glioblastoma, IDH-wildtype	IV	unmethylated	wildtype	Tumor progression	Clinicoradiological follow-up	2.5	2	37.5	0.09	5.8764
72	34.189	Astrocytoma, IDH-mutant	III	not available	mutated	Treatment-related changes	Histopathology (resection)	2	2	37.5	0.74	1.8125
73	39.1699	Oligodendroglioma, IDH-mutant and 1p/19q-codeleted	III	methylated	mutated	Treatment-related changes	Histopathology (resection)	2.2	1.9	37.5	0.02	1.46853
74	47.6822	Oligodendroglioma, IDH-mutant and 1p/19q-codeleted	III	methylated	mutated	Tumor progression	Histopathology (resection)	2.1	1.8	32.5	0.85	4.9589
75	38.9644	Astrocytoma, IDH-mutant	II	not available	mutated	Tumor progression	Histopathology (resection)	1.4	1.4	37.5	0.68	1.5
76	33.9205	Astrocytoma, IDH-wildtype	II	not available	wildtype	Treatment-related changes	Clinicoradiological follow-up	1.9	1.9	37.5	0.95	2.83146
77	56.4219	Glioblastoma, IDH-wildtype	IV	unmethylated	wildtype	Tumor progression	Histopathology (resection)	2	1.9	6.5	-0.82	1.4386
78	45.2164	Glioblastoma, IDH-wildtype	IV	methylated	wildtype	Tumor progression	Clinicoradiological follow-up	3.5	2.4	22.5	-0.74	6.25185
79	41.537	Glioblastoma, IDH-mutant	IV	methylated	mutated	Tumor progression	Histopathology (resection)	1.9	1.9	15.5	-0.39	3.74684
80	68.6849	Glioblastoma, IDH-wildtype	IV	unmethylated	wildtype	Tumor progression	Histopathology (resection)	2.2	1.9	18.5	-0.59	2.3937
81	58.4493	Glioblastoma, IDH-wildtype	IV	methylated	wildtype	Treatment-related changes	Clinicoradiological follow-up	2.1	1.9	18.5	-0.14	1.19231
82	61.7041	Glioblastoma, IDH-wildtype	IV	methylated	wildtype	Tumor progression	Clinicoradiological follow-up	2.6	2.1	37.5	1.74	1.34054
83	52.8466	Glioblastoma, IDH-wildtype	IV	unmethylated	wildtype	Tumor progression	Histopathology (resection)	2.5	2.1	32.5	1.2	3.19388
84	46.1616	Astrocytoma, IDH-mutant	III	unmethylated	mutated	Tumor progression	Histopathology (resection)	2.2	2	37.5	0.59	1.71111
85	69.1041	Glioblastoma, IDH-wildtype	IV	methylated	wildtype	Treatment-related changes	Histopathology (biopsy)	1.3	1.3	37.5	0.9174	1.91743
86	43.7205	Oligodendroglioma, IDH-mutant and 1p/19q-codeleted	II	methylated	mutated	Tumor progression	Histopathology (biopsy)	4.2	2.7	15.5	-0.90168	3.86735
87	71.9233	Glioblastoma, IDH-wildtype	IV	unmethylated	wildtype	Tumor progression	Histopathology (biopsy)	2.2	2	27.5	0.17532	2.92366
88	61.6137	Glioblastoma, IDH-wildtype	IV	unmethylated	wildtype	Tumor progression	Histopathology (resection)	2.4	2.1	6.5	-0.32172	3.77333
89	61.1562	Oligodendroglioma, IDH-mutant and 1p/19q-codeleted	III	methylated	mutated	Tumor progression	Histopathology (resection)	2.2	2	27.5	-0.4584	2.05607
90	70.0849	Glioblastoma, IDH-wildtype	IV	methylated	wildtype	Tumor progression	Histopathology (resection)	2.7	2.3	37.5	0.5406	5.67089
91	45.7178	Glioblastoma, IDH-mutant	IV	methylated	mutated	Tumor progression	Clinicoradiological follow-up	2	2	37.5	0.88692	2.79845
92	34.6438	Astrocytoma, IDH-wildtype	III	methylated	wildtype	Tumor progression	Histopathology (resection)	1.9	1.8	37.5	0.88488	1.16495
93	31.0329	Glioblastoma, IDH-wildtype	IV	unmethylated	wildtype	Tumor progression	Clinicoradiological follow-up	2.6	2.2	18.5	-0.68544	3.3125
94	51.3616	Glioblastoma, IDH-wildtype	IV	unmethylated	wildtype	Tumor progression	Clinicoradiological follow-up	1.6	1.6	27.5	0.37188	4.23404
95	56.4192	Astrocytoma, IDH-mutant	III	methylated	mutated	Tumor progression	Clinicoradiological follow-up	2.6	2	37.5	1.15884	2.90526
96	66.6466	Glioblastoma, IDH-wildtype	IV	unmethylated	wildtype	Tumor progression	Clinicoradiological follow-up	1.3	1.3	32.5	0.35976	1.7
97	55.6466	Glioblastoma, IDH-wildtype	IV	methylated	wildtype	Treatment-related changes	Clinicoradiological follow-up	2.4	1.9	32.5	0.32316	2.80899
98	64.4932	Oligodendroglioma, IDH-mutant and 1p/19q-codeleted	III	methylated	mutated	Treatment-related changes	Clinicoradiological follow-up	0.9	0.9	32.5	0.34008	1.15789
99	67.674	Glioblastoma, IDH-wildtype	IV	methylated	wildtype	Treatment-related changes	Clinicoradiological follow-up	1.5	1.5	27.5	-0.16128	1.12258
100	46.4795	Glioblastoma, IDH-wildtype	IV	unmethylated	wildtype	Tumor progression	Clinicoradiological follow-up	1.8	1.8	32.5	-0.26724	3.0404
101	59.5041	Glioblastoma, IDH-wildtype	IV	methylated	wildtype	Tumor progression	Histopathology (resection)	4.2	2.7	22.5	-0.47196	2.76687
102	57.5534	Glioblastoma, IDH-wildtype	IV	unmethylated	wildtype	Tumor progression	Clinicoradiological follow-up	2.1	2	32.5	0.17412	4.21951
103	40.4877	Glioblastoma, IDH-mutant	IV	methylated	mutated	Tumor progression	Histopathology (biopsy)	2.6	2.3	32.5	0.375	3.90351
104	54.8658	Glioblastoma, IDH-wildtype	IV	methylated	wildtype	Tumor progression	Histopathology (resection)	2.7	2.2	37.5	2.13684	3.82222
